# Supplementary material for: Population connectivity and larval dispersal of the exploited mangrove crab Ucides cordatus along the Brazilian coast
Source: PeerJ. 2018 Apr 30;6:e4702. doi: 10.7717/peerj.4702 (PMC5933341; doi:10.7717/peerj.4702)
Supplement: Supplemental Information 1 [file peerj-06-4702-s001.xlsx]

## Sheet: Planilha1
	6
SP_Cananeia	BA_Caravelas	CE_Fortim	CE_Caucaia	PA_Curuca	PA_Soure
0						SP_Cananeia
1380	0					BA_Caravelas
3280	1900	0				CE_Fortim
3420	2040	140	0			CE_Caucaia
4620	3240	1340	1200	0		PA_Curuca
4710	3330	1430	1290	90	0	PA_Soure
