# Supplementary material for: Population connectivity and larval dispersal of the exploited mangrove crab Ucides cordatus along the Brazilian coast
Source: PeerJ. 2018 Apr 30;6:e4702. doi: 10.7717/peerj.4702 (PMC5933341; doi:10.7717/peerj.4702)
Supplement: Supplemental Information 2 — The genotypes (raw data) used in the analyzes performed to calculate the estimates used in the manuscript. The data is distributed in the GENPOP software format (http://genepop.curtin.edu.au). [file peerj-06-4702-s002.xlsx]

## Sheet: Planilha1
9	319	6	91	51	49	44	42	42
Ucides			CAN	CAR	FOR	CAU	CUR	SOU
SAMPLE	SITE	Locus01_FJ483820		Locus02_FJ483821		Locus03_FJ483822		Locus04_FJ483823		Locus05_FJ483824		Locus06_FJ483825		Locus07_FJ483826		Locus08_FJ483827		Locus09_SemNo
can1	CAN	123	127	139	159	119	123	160	160	173	177	213	265	207	207	272	278	302	338
can2	CAN	123	127	139	163	123	123	164	160	165	169	213	225	195	207	272	290	346	346
can3	CAN	127	139	139	139	123	135	168	164	165	173	193	253	191	195	272	290	346	346
can4	CAN	123	127	151	163	123	135	160	160	177	177	213	241	199	195	311	272	346	310
can5	CAN	123	127	155	163	123	127	160	160	165	165	213	245	187	195	266	272	330	346
can6	CAN	123	127	139	155	127	159	160	160	165	165	213	257	195	207	305	311	346	346
can7	CAN	123	127	139	139	119	123	164	164	165	177	217	221	203	191	272	275	306	346
can8	CAN	127	127	139	155	123	123	164	164	165	177	193	217	195	207	272	308	334	346
can9	CAN	127	127	139	163	119	127	160	160	165	165	193	217	207	211	272	311	346	350
can10	CAN	123	127	139	143	123	119	160	160	165	177	217	253	175	191	272	317	338	346
can11	CAN	123	127	139	163	123	131	164	160	165	173	193	249	195	207	299	305	334	346
can12	CAN	127	127	139	139	123	127	160	168	165	169	193	221	191	195	272	302	350	350
can13	CAN	127	127	139	163	119	159	160	164	165	177	193	217	199	195	275	308	306	314
can14	CAN	127	139	139	163	119	123	164	168	165	165	213	221	191	211	272	317	314	342
can15	CAN	123	123	139	159	123	159	168	160	165	177	193	249	207	195	272	302	338	350
can16	CAN	123	127	139	167	123	127	164	164	165	169	245	261	195	187	272	299	302	346
can18	CAN	127	115	139	155	127	159	164	160	165	173	197	245	187	195	272	272	326	354
can19	CAN	127	127	139	139	159	123	160	160	165	177	213	217	191	199	272	272	346	350
can20	CAN	123	127	155	159	119	127	0	0	165	169	217	245	207	187	272	293	314	334
can21	CAN	127	139	139	163	127	127	160	164	165	177	213	273	183	195	272	296	314	314
can22	CAN	127	143	139	139	123	127	164	164	165	177	221	245	191	195	272	272	314	346
can23	CAN	123	127	139	139	159	159	164	164	173	177	221	261	199	195	284	311	318	346
can24	CAN	127	127	139	139	119	127	164	160	165	165	201	209	207	195	275	272	314	346
can25	CAN	123	127	131	139	123	123	160	164	165	169	213	253	195	199	272	308	346	346
can26	CAN	123	127	139	139	119	123	168	160	165	165	249	253	195	207	272	302	346	302
can27	CAN	127	131	131	159	123	127	160	160	165	177	217	249	207	211	296	308	306	310
can28	CAN	123	123	139	139	123	159	164	164	165	177	193	261	195	207	272	272	346	346
can29	CAN	123	139	139	167	123	127	168	160	165	177	221	261	183	207	272	302	306	354
can30	CAN	127	127	139	159	123	135	168	160	165	173	185	205	207	195	272	272	314	346
can32	CAN	123	127	163	131	123	135	160	160	165	177	197	273	175	195	293	308	306	306
can33	CAN	127	115	139	167	135	123	164	164	165	165	213	253	195	207	272	272	342	346
can34	CAN	127	127	159	167	127	127	164	160	165	165	217	257	179	195	272	272	346	346
can38	CAN	119	127	139	167	127	159	164	164	165	165	185	193	191	207	272	287	322	346
can40	CAN	123	127	139	167	123	159	164	164	165	165	217	245	207	195	272	305	314	346
can41	CAN	123	127	139	167	135	123	164	160	177	177	213	221	195	207	272	311	334	350
can42	CAN	123	123	163	159	159	123	168	168	177	177	189	261	207	195	272	308	310	314
can43	CAN	123	127	143	159	123	159	160	164	165	173	245	261	195	195	266	272	314	346
can44	CAN	123	127	159	151	123	123	164	164	165	165	201	213	207	195	272	305	310	346
can45	CAN	127	127	159	139	123	123	164	164	165	173	193	261	207	195	302	302	338	346
can46	CAN	123	115	143	167	135	135	160	160	165	165	189	273	195	207	272	296	334	346
can47	CAN	127	115	139	143	119	123	160	160	165	177	185	257	211	195	302	305	338	338
can48	CAN	127	127	159	167	159	159	164	160	165	177	213	213	175	195	272	272	322	346
can49	CAN	127	127	139	155	123	159	160	164	165	165	201	257	207	195	272	305	302	350
can50	CAN	123	143	139	159	123	131	160	164	165	177	245	269	207	211	272	302	346	322
can52	CAN	123	127	139	159	123	131	160	164	165	173	197	257	183	195	311	272	338	346
can53	CAN	127	127	139	163	123	127	0	0	165	177	261	189	195	195	272	272	338	354
can54	CAN	127	127	155	163	123	131	164	164	165	165	189	253	195	207	272	314	338	342
can55	CAN	123	127	139	167	111	123	172	160	165	165	245	245	195	207	272	272	342	354
can56	CAN	123	127	155	131	119	123	160	160	165	165	221	261	195	191	272	308	346	350
can57	CAN	123	127	139	163	159	123	164	164	165	169	217	217	199	191	272	272	306	318
can58	CAN	123	127	159	163	111	123	164	160	165	165	225	269	195	195	272	272	346	318
can59	CAN	127	127	131	139	111	123	0	0	177	177	221	253	195	207	272	275	310	346
can60	CAN	127	127	131	139	123	127	160	164	165	165	197	217	195	207	272	272	326	302
can61	CAN	123	127	139	139	123	123	164	164	165	165	213	249	207	195	272	311	334	346
can62	CAN	127	143	139	163	127	127	160	160	165	177	201	225	195	199	293	296	326	346
can63	CAN	123	127	139	163	123	123	164	160	169	177	193	217	179	191	272	299	306	314
can64	CAN	127	127	163	163	127	127	160	164	165	165	205	245	207	207	311	311	306	346
can65	CAN	123	127	155	159	123	159	168	160	165	165	213	217	195	195	314	317	306	310
can66	CAN	123	127	159	163	123	123	160	160	165	165	201	273	187	207	305	308	306	302
can67	CAN	127	127	139	155	123	123	160	160	165	165	197	197	195	195	272	272	346	318
can68	CAN	123	127	139	163	123	135	160	160	165	165	225	221	183	195	272	305	346	326
can70	CAN	127	127	151	163	123	123	0	0	165	165	197	217	191	207	272	275	342	354
can71	CAN	127	127	139	139	159	135	0	0	165	165	197	257	207	199	320	320	306	314
can72	CAN	123	127	139	159	123	123	0	0	165	173	201	249	195	207	272	272	338	346
can73	CAN	123	127	139	159	123	159	164	168	165	165	225	249	191	207	272	272	338	346
can74	CAN	127	127	139	139	123	127	160	164	165	165	189	217	207	207	272	305	342	350
can75	CAN	127	127	139	163	123	135	164	176	169	177	217	273	191	211	272	272	342	346
can76	CAN	127	127	155	159	135	135	160	164	173	177	217	205	195	199	272	308	314	346
can77	CAN	127	127	151	155	123	123	168	164	165	165	245	257	207	207	272	302	330	346
can78	CAN	127	127	159	163	123	159	168	160	177	177	221	249	195	207	275	314	330	346
can79	CAN	127	127	139	163	127	127	160	164	165	165	193	265	195	191	275	290	310	346
can80	CAN	127	127	139	159	123	123	160	160	165	173	193	261	199	191	272	305	306	346
can81	CAN	127	127	151	139	123	127	160	160	165	177	221	253	195	207	272	305	306	346
can82	CAN	123	123	139	139	123	123	160	164	173	177	197	269	207	195	305	272	350	346
can83	CAN	127	127	139	155	123	127	160	164	165	173	217	249	195	191	272	311	306	346
can84	CAN	123	127	159	159	123	123	160	176	165	169	201	217	195	195	272	305	346	326
can85	CAN	127	127	159	159	123	127	168	160	165	173	217	253	207	207	272	305	338	338
can86	CAN	123	127	139	163	123	127	164	164	161	165	217	269	207	199	311	320	318	322
can87	CAN	123	123	135	139	123	123	164	160	177	177	217	245	195	207	272	311	310	350
can88	CAN	123	123	139	159	123	123	164	164	165	177	193	209	191	207	311	272	334	346
can90	CAN	123	127	163	151	127	135	164	160	165	165	265	269	195	195	272	311	346	310
can91	CAN	123	127	139	159	127	159	160	164	165	165	197	173	207	195	272	299	334	346
can92	CAN	127	127	131	151	123	123	0	0	165	165	189	201	207	195	275	305	346	350
can93	CAN	123	123	139	151	123	127	164	164	165	173	217	257	195	191	272	311	346	334
can94	CAN	127	127	139	163	123	159	164	160	165	165	221	257	191	195	272	305	314	346
can95	CAN	123	127	139	151	123	159	164	164	165	165	193	245	199	195	311	317	314	346
can96	CAN	127	127	139	139	123	123	160	164	165	165	189	245	195	207	272	314	310	334
can97	CAN	127	127	139	159	123	123	160	164	165	165	197	245	195	207	272	305	346	330
can98	CAN	123	127	139	159	123	135	160	160	165	165	217	225	191	207	272	275	310	334
can99	CAN	123	127	139	155	135	159	164	160	165	169	253	261	195	207	305	305	306	334
can100	CAN	123	127	139	159	135	159	164	164	165	165	193	193	207	207	272	275	326	334
BA1B	CAR	127	127	159	159	123	127	164	160	165	177	217	225	191	207	311	314	338	318
BA2B	CAR	127	127	159	159	119	123	160	160	169	165	213	241	195	191	302	314	338	322
BA3B	CAR	127	127	139	159	127	135	164	160	165	165	217	261	207	207	272	311	326	298
BA4B	CAR	123	127	139	159	119	123	168	160	173	177	193	249	195	207	272	320	346	346
BA5B	CAR	123	127	155	159	123	123	160	164	177	177	217	233	195	195	311	314	302	334
BA7B	CAR	123	127	139	159	123	135	164	164	165	177	197	209	195	191	308	320	346	334
BA8B	CAR	127	127	139	159	123	127	164	160	165	165	193	217	195	207	272	272	346	346
BA3C	CAR	123	127	139	151	123	159	160	160	169	165	177	217	195	191	272	275	326	330
BA6C	CAR	123	127	139	159	127	127	164	160	165	165	197	245	191	191	272	272	330	354
BA7C	CAR	127	127	139	139	123	135	160	160	177	173	253	257	207	203	272	311	346	314
BA8C	CAR	127	127	151	159	123	135	160	160	173	177	193	269	191	191	272	311	306	334
BA4D	CAR	123	127	139	155	135	159	164	164	165	177	245	253	207	211	308	311	314	330
BA5D	CAR	127	127	155	159	123	127	160	160	165	165	217	249	195	207	272	272	346	318
BA6D	CAR	127	119	139	159	159	135	164	164	165	165	197	265	191	207	272	275	314	338
BA7D	CAR	123	127	139	139	123	127	164	164	165	177	245	257	195	207	305	311	318	334
BA8D	CAR	127	127	139	151	135	135	164	160	165	173	193	265	195	207	272	272	302	306
BA9D	CAR	127	127	151	159	119	123	168	168	165	169	221	253	191	195	311	317	338	354
BA10D	CAR	123	127	139	159	127	131	164	168	165	173	217	249	207	207	308	317	318	334
BA1E	CAR	127	127	135	159	123	123	164	168	165	169	205	221	195	207	305	308	346	334
BA2E	CAR	123	127	139	155	127	127	160	164	177	177	213	261	195	191	272	275	350	330
BA3E	CAR	127	127	139	155	119	123	164	164	165	165	193	213	207	195	272	275	334	354
BA4E	CAR	123	127	139	155	123	123	164	164	177	177	193	241	195	207	272	305	306	338
BA5E	CAR	127	127	143	159	127	135	160	160	165	173	185	265	195	195	272	272	330	334
BA7E	CAR	127	127	139	155	123	135	160	160	165	177	201	213	207	207	281	272	314	318
BA9E	CAR	127	123	139	159	123	123	0	0	165	165	261	265	195	195	275	326	338	354
BA10E	CAR	127	127	139	159	127	135	164	164	165	177	213	245	207	207	272	272	302	310
BA2F	CAR	127	135	139	159	123	127	164	164	165	177	245	265	195	207	272	275	306	338
BA4F	CAR	127	123	155	163	127	127	164	160	165	177	189	249	195	199	272	275	330	354
BA5F	CAR	127	127	155	155	127	135	164	164	165	177	213	245	191	195	272	272	318	342
BA7F	CAR	123	123	151	159	123	127	164	160	165	165	213	237	191	207	272	299	330	306
BA8F	CAR	127	127	155	159	123	123	160	164	165	177	193	213	199	199	272	326	342	346
BA9F	CAR	123	123	139	159	119	127	160	164	165	165	193	257	195	195	272	275	346	310
BA10F	CAR	123	127	139	139	123	135	164	164	169	177	213	257	191	195	272	272	318	346
BA1G	CAR	123	127	139	155	119	135	160	160	165	165	189	225	195	195	272	284	346	346
BA2G	CAR	127	127	131	155	123	135	160	164	165	169	193	245	207	195	272	311	350	346
BA3G	CAR	127	127	139	151	123	131	160	164	165	165	213	257	207	195	272	272	338	346
BA6G	CAR	127	127	139	155	127	131	164	164	165	169	205	213	207	199	272	314	306	306
BA7G	CAR	127	127	139	159	123	131	160	164	165	165	189	213	191	207	272	320	346	330
BA10G	CAR	123	127	139	155	123	135	160	164	165	165	193	245	195	207	272	308	346	330
BA1H	CAR	127	127	139	151	119	123	164	164	165	165	241	253	195	207	272	272	338	346
BA2H	CAR	127	127	155	159	123	135	0	0	165	169	221	257	207	195	326	275	342	302
BA3H	CAR	123	127	151	155	127	127	0	0	165	165	193	213	191	191	272	275	346	342
BA4H	CAR	127	127	159	159	135	135	0	0	165	169	193	193	195	207	272	314	346	358
BA5H	CAR	123	123	151	159	123	123	160	160	165	165	213	253	191	207	272	272	314	314
BA6H	CAR	123	127	139	155	135	159	160	160	169	177	197	205	191	207	275	311	346	350
BA8H	CAR	127	127	139	155	123	135	160	160	165	177	193	213	207	195	311	314	346	350
BA10H	CAR	127	131	155	159	123	159	164	164	165	165	213	233	191	207	272	320	306	342
BA1I	CAR	123	127	139	159	123	119	160	156	165	177	241	257	207	191	311	320	354	346
BA3I	CAR	127	127	139	143	127	127	164	160	165	165	193	253	207	211	272	272	338	310
BA9I	CAR	127	127	155	155	123	127	164	164	165	165	245	265	207	211	272	272	346	334
BA10I	CAR	127	127	139	159	123	159	160	164	165	165	193	245	199	207	272	314	334	338
F02	FOR	123	127	139	159	127	123	160	160	165	169	193	197	195	207	272	320	306	306
F03	FOR	127	127	139	155	127	123	0	0	165	177	225	261	191	195	272	314	306	310
F04	FOR	127	123	139	159	123	127	164	164	165	177	197	249	195	207	272	320	334	322
F05	FOR	127	127	159	159	135	135	160	160	165	177	197	249	195	195	275	275	334	314
F06	FOR	127	127	143	155	123	159	160	164	165	177	217	249	195	199	272	314	326	314
F07	FOR	123	127	139	151	123	135	160	160	165	169	197	249	207	195	272	311	334	334
F08	FOR	127	127	139	151	119	135	160	168	165	165	197	197	207	199	272	311	326	306
F09	FOR	127	123	139	151	119	127	164	160	165	177	249	261	195	195	272	272	338	326
F10	FOR	127	127	143	163	123	135	164	164	165	177	177	225	207	195	272	317	330	330
F11	FOR	127	127	151	159	127	159	164	164	165	165	197	249	207	195	272	311	330	334
F12	FOR	127	127	131	139	123	127	160	164	165	165	249	265	195	195	272	314	330	314
F13	FOR	127	119	163	163	127	159	0	0	165	165	197	221	195	195	272	320	338	330
F14	FOR	127	127	151	159	127	127	160	164	165	165	197	249	195	195	272	272	334	334
F15	FOR	127	127	139	159	123	127	164	164	177	177	217	221	207	195	272	275	330	334
F16	FOR	127	127	151	163	127	127	164	160	165	169	221	249	207	207	311	314	330	314
F17	FOR	123	127	151	163	127	127	164	164	165	177	193	273	195	195	272	272	334	334
F18	FOR	127	119	139	159	123	127	164	164	165	165	197	221	207	195	272	317	334	310
F20	FOR	127	127	139	151	127	127	164	164	165	173	213	217	195	207	311	272	342	306
F21	FOR	127	127	139	151	131	135	160	160	165	165	221	253	191	207	272	272	334	310
F23	FOR	127	127	139	151	127	135	160	164	165	177	225	253	195	207	293	311	338	330
F24	FOR	123	123	131	159	123	159	0	0	165	165	249	249	199	207	272	272	318	334
F25	FOR	127	127	139	159	123	123	160	164	165	165	249	265	195	195	272	314	322	310
F26	FOR	127	127	151	163	127	135	160	164	165	173	201	217	207	207	272	317	334	322
F27	FOR	123	123	139	139	123	135	164	160	165	165	241	249	195	207	272	320	306	334
F28	FOR	123	127	139	139	123	159	160	164	165	165	253	269	207	195	272	311	334	330
F29	FOR	127	127	163	163	135	135	160	160	165	165	213	217	191	207	293	320	338	346
F30	FOR	123	127	139	151	127	135	160	164	165	165	217	197	195	207	272	272	334	310
F31	FOR	127	123	143	163	127	131	160	160	165	177	217	273	195	195	272	314	334	334
F32	FOR	127	127	139	163	123	127	164	164	165	165	217	253	207	207	272	272	334	310
F33	FOR	127	127	139	139	123	127	164	164	173	177	257	265	195	191	272	308	334	306
F34	FOR	127	127	139	163	127	135	160	160	165	173	221	249	195	207	272	314	334	334
F35	FOR	127	127	151	163	127	131	164	164	165	165	197	225	207	195	272	320	334	310
F36	FOR	127	127	151	163	127	159	164	160	169	177	201	217	195	207	272	275	330	330
F37	FOR	127	127	139	159	123	131	160	164	165	165	193	249	195	195	275	275	334	310
F38	FOR	127	127	151	159	123	159	164	164	165	173	197	257	191	207	272	314	334	310
F39	FOR	127	127	139	163	123	123	164	164	165	165	201	253	207	195	272	272	326	330
F40	FOR	123	127	139	163	123	127	160	160	165	177	177	249	207	211	311	317	334	310
F41	FOR	127	127	139	163	119	127	164	164	165	165	213	197	195	195	272	272	334	334
F42	FOR	127	123	151	167	123	135	176	160	165	169	249	249	195	207	272	320	334	314
F43	FOR	123	127	139	163	131	131	164	164	173	177	197	213	207	207	275	311	334	306
F44	FOR	123	123	155	139	123	123	160	164	165	165	201	273	195	207	272	311	338	334
F45	FOR	127	127	131	163	119	123	164	164	165	177	249	261	207	207	272	314	334	334
F46	FOR	127	127	159	163	123	123	160	160	165	165	225	273	195	195	272	272	334	330
F47	FOR	127	127	139	163	127	135	0	0	165	177	225	249	191	207	272	272	314	310
F48	FOR	127	127	139	155	123	159	164	164	165	173	265	273	195	195	272	296	306	330
F49	FOR	123	127	139	155	127	135	164	164	165	177	225	253	195	195	272	272	306	326
F50	FOR	127	127	139	159	123	135	164	164	165	165	261	277	195	207	272	296	334	326
F51	FOR	127	127	139	159	123	123	164	164	165	165	201	277	195	207	272	311	306	306
F52	FOR	127	127	139	143	123	123	164	164	165	169	225	225	195	195	272	302	334	334
cau1	CAU	127	127	159	139	123	123	164	164	165	165	253	269	207	207	272	317	346	334
cau2	CAU	127	127	147	139	127	127	160	160	165	165	217	249	191	207	272	317	346	334
cau3	CAU	127	127	139	155	119	123	164	160	177	177	197	257	195	207	272	305	338	334
cau4	CAU	127	127	139	155	123	123	160	164	169	165	205	217	195	195	272	314	302	334
cau6	CAU	123	123	151	159	123	127	164	164	173	177	197	229	195	191	260	272	326	334
cau7	CAU	123	127	139	139	123	135	164	164	177	177	197	253	191	207	272	296	326	334
cau8	CAU	123	127	139	139	123	159	164	164	165	177	197	265	195	207	272	278	326	346
cau9	CAU	127	127	139	139	127	127	160	160	165	173	197	201	207	207	272	272	298	334
cau10	CAU	127	123	139	139	123	135	164	164	165	165	201	217	195	191	272	302	346	338
cau11	CAU	127	123	139	155	123	127	164	164	165	165	177	261	195	195	296	305	298	334
cau12	CAU	127	127	159	139	123	127	164	160	165	165	193	253	195	195	272	272	306	334
cau13	CAU	127	123	139	151	135	159	164	164	165	165	197	221	195	195	272	296	330	310
cau14	CAU	127	123	139	151	123	135	164	164	177	173	197	249	195	207	272	272	314	334
cau15	CAU	123	127	155	159	127	127	168	160	165	173	197	201	207	211	272	305	334	334
cau16	CAU	127	127	139	155	135	135	168	168	165	165	201	205	195	195	272	317	346	338
cau17	CAU	127	127	139	139	123	123	160	164	165	165	221	261	207	207	311	272	322	338
cau19	CAU	131	127	155	159	123	135	160	164	165	177	189	269	195	195	272	314	334	342
cau20	CAU	127	127	147	159	123	123	164	164	177	177	193	221	195	195	272	314	314	302
cau21	CAU	127	123	139	139	127	131	168	168	177	165	193	201	207	211	305	305	302	314
cau22	CAU	127	127	159	139	123	127	164	160	165	177	197	265	195	195	272	314	330	334
cau23	CAU	127	123	159	159	123	127	164	164	165	177	217	261	207	215	305	317	326	334
cau24	CAU	127	123	139	159	131	159	164	164	165	165	213	257	199	211	272	317	314	322
cau25	CAU	127	127	159	139	127	127	160	160	165	165	193	249	195	195	272	305	306	338
cau26	CAU	127	127	155	159	135	159	164	164	165	169	193	245	207	211	272	314	314	346
cau27	CAU	123	127	151	155	123	131	168	168	165	165	201	217	191	203	311	311	322	334
cau28	CAU	127	127	151	151	123	127	160	164	173	177	221	245	195	195	272	302	310	302
cau29	CAU	123	123	155	159	123	135	160	160	165	177	221	253	195	207	272	272	338	342
cau30	CAU	123	127	139	159	123	135	164	164	165	177	213	217	195	195	272	317	314	342
cau31	CAU	127	127	139	139	127	135	0	0	169	173	197	257	195	207	272	317	334	338
cau32	CAU	127	127	139	155	123	127	164	164	165	165	245	265	207	191	272	320	330	346
cau33	CAU	127	127	147	159	135	135	0	0	165	177	213	217	195	195	272	278	334	346
cau34	CAU	127	123	159	159	123	123	160	160	165	165	193	245	207	195	272	320	326	334
cau35	CAU	127	127	147	159	123	127	0	0	173	177	189	197	207	207	308	314	294	342
cau36	CAU	127	127	139	139	123	127	164	164	165	165	193	257	195	207	272	281	310	342
cau37	CAU	123	127	139	147	123	131	164	164	165	165	209	213	195	207	308	314	306	334
cau38	CAU	127	127	155	155	127	135	164	164	165	173	197	245	195	195	272	272	334	334
cau39	CAU	123	127	139	151	127	135	0	0	165	173	205	265	207	195	272	317	306	346
cau40	CAU	127	127	139	139	127	131	160	160	165	177	217	241	195	195	272	305	342	334
cau41	CAU	123	127	131	139	123	123	164	164	169	177	213	249	195	199	272	272	334	334
cau42	CAU	127	127	139	139	123	127	160	160	165	165	205	209	195	195	272	314	318	314
cau43	CAU	127	127	139	139	123	159	164	164	165	165	217	241	195	207	305	314	314	314
cau45	CAU	127	127	139	163	123	123	164	164	165	165	209	249	207	207	272	305	334	314
cau46	CAU	127	127	151	163	127	159	0	0	165	177	193	253	191	207	272	320	314	334
cau50	CAU	127	127	159	163	123	135	160	164	165	177	189	213	207	195	272	272	306	330
cur1	CUR	123	123	139	155	123	127	176	164	165	165	197	217	195	195	272	272	338	330
cur2	CUR	127	127	139	159	127	127	160	172	165	165	201	221	195	195	272	284	298	326
cur3	CUR	127	127	151	159	135	159	164	164	165	177	209	249	207	195	272	272	354	314
cur4	CUR	127	127	139	159	127	123	168	164	165	165	249	249	195	191	272	314	334	334
cur5	CUR	127	127	139	159	123	123	168	172	165	165	249	249	191	191	272	311	338	354
cur9	CUR	127	127	159	159	123	123	164	164	165	165	193	249	207	207	272	293	302	350
cur10	CUR	127	123	139	151	119	123	160	164	165	177	217	273	195	195	272	272	338	346
cur11	CUR	127	127	151	139	123	127	160	168	165	165	201	257	195	203	272	317	350	354
cur13	CUR	127	123	159	159	123	123	164	164	165	165	197	221	207	207	272	320	334	350
cur15	CUR	127	127	155	159	123	135	160	160	165	177	221	221	207	207	272	281	306	302
cur16	CUR	123	127	159	159	123	123	160	164	165	177	249	257	195	195	272	272	314	346
cur17	CUR	127	127	139	139	119	131	164	160	165	177	249	253	207	207	272	314	334	310
cur19	CUR	123	127	151	159	119	123	164	164	165	165	189	209	191	195	272	314	306	346
cur20	CUR	127	135	151	159	127	135	164	164	165	177	213	261	207	207	266	302	330	310
cur21	CUR	127	127	139	139	123	127	160	160	165	177	201	253	195	195	272	314	310	338
cur22	CUR	127	135	155	159	127	123	164	164	165	177	213	225	195	195	314	272	342	342
cur23	CUR	127	127	143	155	119	127	160	160	165	177	201	205	191	207	293	308	318	338
cur24	CUR	127	123	135	151	123	127	160	160	165	165	205	257	195	207	272	272	346	346
cur25	CUR	127	127	151	155	127	159	160	160	177	177	189	261	195	207	320	272	346	338
cur26	CUR	123	127	139	159	123	127	164	164	165	165	249	261	195	195	272	275	322	334
cur27	CUR	127	135	139	139	123	159	164	164	165	165	201	213	199	207	272	311	314	326
cur28	CUR	127	135	155	163	127	135	160	168	169	177	201	249	195	195	272	305	306	326
cur29	CUR	127	127	159	139	135	123	168	164	165	165	213	213	207	195	272	317	306	330
cur30	CUR	127	127	143	159	123	123	0	0	177	177	201	245	199	207	275	308	306	306
cur31	CUR	123	123	139	159	119	135	160	160	165	165	213	193	195	195	293	317	350	306
cur33	CUR	123	123	147	139	123	131	160	160	165	165	189	245	195	199	272	272	346	326
cur34	CUR	123	127	151	155	131	159	160	164	165	177	213	245	195	195	311	311	298	330
cur35	CUR	127	127	139	151	119	135	164	172	165	165	205	217	195	207	302	308	314	346
cur36	CUR	123	127	139	151	123	131	164	164	165	165	189	201	191	195	272	320	310	338
cur37	CUR	127	127	139	139	123	123	172	172	177	165	257	265	207	207	272	311	318	338
cur38	CUR	127	127	139	159	123	123	164	164	165	165	213	253	195	195	272	275	318	338
cur39	CUR	123	123	139	151	123	159	164	164	165	165	261	197	195	211	272	302	338	342
cur40	CUR	123	127	151	155	119	127	160	160	173	177	185	209	191	195	272	275	310	338
cur41	CUR	123	143	139	159	127	131	164	164	165	165	213	213	199	207	272	272	310	334
cur42	CUR	123	127	139	155	123	123	164	164	165	173	209	257	195	195	272	275	302	338
cur43	CUR	123	127	139	159	123	123	0	0	165	165	201	241	191	207	308	311	314	338
cur44	CUR	123	123	155	155	131	159	164	164	165	177	213	241	195	195	272	275	330	334
cur45	CUR	127	127	139	155	123	123	160	160	165	165	209	261	207	207	272	272	326	334
cur46	CUR	127	123	159	159	123	127	164	164	165	177	189	245	195	207	272	272	334	342
cur47	CUR	127	123	139	151	123	135	164	164	165	165	213	173	195	195	272	272	310	334
cur48	CUR	123	127	139	159	123	159	164	164	165	165	265	249	207	195	272	308	330	338
cur50	CUR	123	127	139	139	123	123	160	160	165	177	173	213	191	207	272	272	310	338
pa1F	SOU	123	127	139	143	123	131	164	164	173	177	213	213	191	211	272	299	334	338
pa2M	SOU	123	123	139	159	123	131	164	164	165	165	253	261	195	207	272	272	334	338
pa2F	SOU	127	127	139	163	123	131	160	156	165	165	193	245	195	195	272	308	338	314
pa3F	SOU	127	127	139	159	127	131	160	160	165	165	201	209	195	207	272	281	342	334
pa4M	SOU	127	127	139	139	123	123	160	164	165	165	249	261	207	207	272	317	306	342
pa4F	SOU	123	123	139	159	123	159	160	168	165	165	193	269	207	207	272	314	334	346
pa5M	SOU	123	123	139	159	119	131	164	164	165	177	237	245	195	207	272	302	314	342
pa5F	SOU	123	127	139	159	123	123	164	164	165	177	221	257	195	195	272	272	318	338
pa6M	SOU	123	127	139	139	123	159	160	160	165	169	209	253	207	207	272	272	346	318
pa7M	SOU	127	127	139	155	123	123	168	168	165	177	209	261	195	207	311	272	306	330
pa7F	SOU	123	127	139	139	123	123	0	0	165	177	189	197	207	207	272	302	338	342
pa8M	SOU	123	131	139	155	127	127	164	164	165	165	197	257	195	191	272	272	314	338
pa8F	SOU	127	127	139	151	123	123	164	164	165	177	201	265	195	195	272	272	330	338
pa9M	SOU	127	127	139	151	123	131	160	164	165	165	205	249	195	207	272	308	338	342
pa9F	SOU	127	143	139	155	123	127	164	164	165	165	221	273	195	207	305	317	310	314
pa10M	SOU	123	123	139	159	123	127	160	160	165	165	197	205	195	195	272	272	346	318
pa10F	SOU	127	123	139	155	123	159	160	160	165	165	249	261	191	195	296	320	338	342
pa11M	SOU	123	127	139	139	123	159	164	164	165	165	249	273	195	191	272	281	354	346
pa11F	SOU	123	127	139	155	123	127	168	164	165	173	197	225	195	195	269	272	346	306
pa12M	SOU	127	127	151	151	123	127	160	160	165	169	181	221	195	195	308	308	338	334
pa12F	SOU	127	127	139	139	123	123	160	164	165	165	221	269	195	195	272	317	334	342
pa13M	SOU	127	127	151	159	123	127	160	160	165	177	253	261	195	179	272	296	342	314
pa13F	SOU	127	127	155	155	123	127	160	160	165	177	205	253	195	207	272	311	338	338
pa14M	SOU	127	127	155	155	123	123	0	0	165	177	197	221	195	207	272	308	318	342
pa15M	SOU	123	127	139	139	127	159	0	0	165	177	201	221	195	207	275	311	334	342
pa15F	SOU	123	143	139	139	119	123	0	0	165	177	201	193	195	191	272	272	338	350
pa16M	SOU	127	127	139	151	123	131	164	164	165	173	221	265	191	207	272	308	322	342
pa16F	SOU	127	135	151	159	135	135	0	0	177	165	249	269	195	207	272	272	350	314
pa17M	SOU	123	127	139	139	119	123	164	164	165	169	213	249	195	195	272	272	314	330
pa17F	SOU	127	135	151	159	123	127	160	160	165	165	253	269	195	195	308	272	302	326
pa18M	SOU	127	127	135	139	119	127	160	160	165	165	201	213	207	195	272	272	354	314
pa18F	SOU	123	127	139	163	127	135	160	160	165	165	217	261	195	207	272	308	318	302
pa19M	SOU	127	127	139	139	123	159	164	164	165	165	197	221	195	191	272	272	306	342
pa19F	SOU	127	143	139	159	123	159	160	164	165	165	221	221	207	207	272	272	306	330
pa20F	SOU	127	143	159	159	123	127	164	164	165	165	197	217	191	195	272	308	330	338
pa21M	SOU	127	127	139	159	123	135	164	164	165	165	205	225	207	211	272	305	310	310
pa22M	SOU	127	127	159	159	123	123	164	164	177	169	217	237	195	207	272	272	346	310
pa22F	SOU	127	127	159	159	123	123	160	160	165	165	217	237	195	207	272	272	314	338
pa23M	SOU	123	127	139	159	127	135	164	164	165	165	217	245	207	195	272	272	334	338
pa23F	SOU	127	127	151	159	123	123	164	164	165	165	213	217	207	207	275	293	310	310
pa24M	SOU	123	127	139	151	123	123	0	0	165	173	221	253	195	207	272	272	338	338
pa24F	SOU	127	127	151	155	119	127	164	160	177	177	197	213	207	191	272	299	338	338
